# Supplementary material for: Modeling the Architecture of Depolymerase-Containing Receptor Binding Proteins in Klebsiella Phages
Source: PubMed Central journal article supplement (PMC6872550; doi:10.3389/fmicb.2019.02649), 2019-11-15
Supplement: Image_1.pdf [file Image_1.pdf]

A

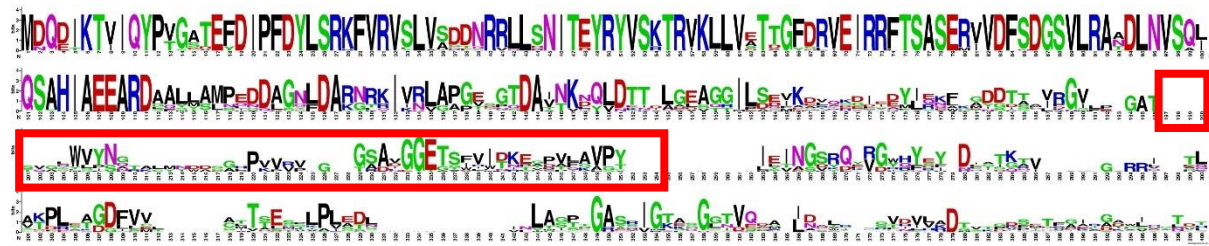

B

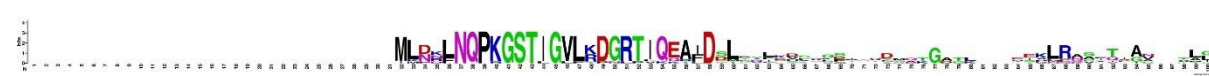

C

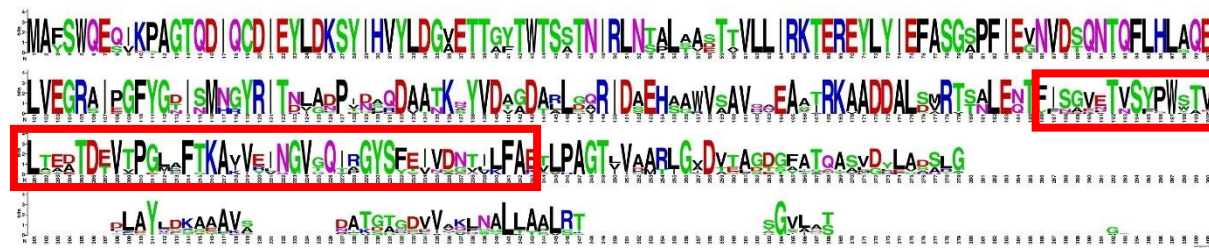

D

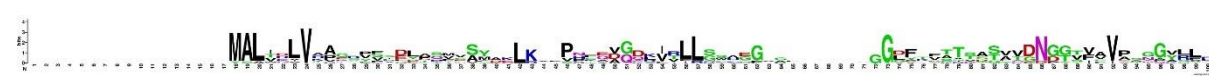

E

MANKP T K P N F P L G L E S Q Q S V F Q E G I L N N G V V E H G P D A V M T V P E T P D A S G V P S A V R Y N E D D D Q F E G Y N E G G W L P L G G N G G R W E A L P H A S S L L Q A G R A

V L V D N T D G V S T V L F P S P K R G D S V T V C D L Y G K F S T Y P L T V D G N G K S Y G S A D S M T I S T D N V S A T F T W T G E A R G W V T S G V G L G G R V Y S R E Y S Q L S A

T S T L S T O P V D V Y D G K R L K E S L Y T L D G Y V K F D P A L A S G S D V Q I Q Y I Q L G G G S G G T V T W E Y N G G A G G E T O V L D V V Y D S V S E Y I R G

R Q Q I R G F T F D T S T I T L A D E L E D D V V V I N G D P T V Y N Q D R T P W E V A R A N N V N E V L S T D K L D G K T Y D V Q W I P G P G K I

V G L G

F

M R N V E E I F G G V V A R P H O I F Y T S T N G G E T E L S L P F P I T G E V T I N G V G V P D N F E D G N T L N L G R E L E G D V V F C L F D K I M S P Q D A S N N A V R

Y K F L S V G G E T E F T P D F T Y G V Q S L Y D G K Y K T P G E D Y N Y F K T S G K V V L D T A L P T G V W V V A E M I K Q N I P A L A G G A G T G L

G

M N P Q F S Q G G S V S K D V N K Q S I A R G K S V A Y L K G K L D Q T G S W L L V T G L

H

M K T Q F N Q S Q G S T S R E T N K E A I R I F L K K S Q V G Y L S T T P D S Y V I L F D K E T Q T C

W Y R T A T G T P S W L T G

I

|   |                |        |        |                                                                                   |
|---|----------------|--------|--------|-----------------------------------------------------------------------------------|
| 1 | YP_009153195.1 | 100.0% | 100.0% | MTNSLIQPKGSVSKETNIQSIARITGSKIEEVKYLEGDLDIAGLKFVDSSTETIWKINGNETGMVDSWNIIVDESTIIV   |
| 2 | YP_007007681.1 | 72.7%  | 20.3%  | MSNNLIQPKGSVSKETNIQSIARINGVKIIEVKYLEGDLVDTGLKYLDSSTETVWKINGDETGLEDNFQDETMTH-Q     |
|   | consensus/100% |        |        | MoNsLIQPKGSVSKETNIQSIARIsGsKIIEVKYLEGDLdlsGLkaIIDSSTETIWKINGsETGhIIsW..I.DEohhI.. |

J

|   |                |        |        |                                                                                  |
|---|----------------|--------|--------|----------------------------------------------------------------------------------|
| 1 | YP_009153197.1 | 100.0% | 100.0% | MANKLTOPKGSISKETNKEAIAARLFGIKKTAVGYISTSVLIDPVTILDESTET-CWYRGTATGTPISWIIITNGSLTLO |
| 2 | YP_007007682.1 | 95.0%  | 23.7%  | MTNKLTOPKGSVSKQLNIQTLSRICGCNENEVSYIYNQLDFNIKYLDPISEKICISNG--SGLVLSYTVSENSIMVIT   |
|   | consensus/100% |        |        | MsNKLTOPKGSIsKphNhpsLuRlhGhpcstVuYI.spl.I.shphLMD..oEp.Ch.pg..oGhsIsAhlopsSlhl.T |

K

|   |                |        |        |                                                                                   |  |
|---|----------------|--------|--------|-----------------------------------------------------------------------------------|--|
|   |                | cov    | pid    | 1                                                                                 |  |
| 1 | YP_009153198.1 | 100.0% | 100.0% | MAFKFKGSLSAVDATLKGKVKFDNEKLPDSKNMPECKFTINEIDNSSTTDIASNTLVTFNECKQDNVAGMLSENTGDWENN |  |
| 2 | YP_007007683.1 | 87.2%  | 48.1%  | MAFKFKGSLSAVDATLKGKVKFDNEKLPDSKNMPECKFTINEIDNSSTTDIASNTLVTFNECKQDNVAGMLSENTGDWENN |  |
|   | consensus/100% |        |        | MAFKFKGSLSAVDATLKGKVKFDNEKLPDSKNMPECKFTINEIDNSSTTDIASNTLVTFNECKQDNVAGMLSENTGDWENN |  |

|   |                |        |        |                                                                            |  |
|---|----------------|--------|--------|----------------------------------------------------------------------------|--|
|   |                | cov    | pid    | 81                                                                         |  |
| 1 | YP_009153198.1 | 100.0% | 100.0% | NSAPVKLMRNVNNSNDSDWVTLFDSKTTVWSSIASAGQVFTVFNDFKKAIYINGIIOYPGISYQTEGGTVTFSN |  |
| 2 | YP_007007683.1 | 87.2%  | 48.1%  | NSAPVKLMRNVNNSNDSDWVTLFDSKTTVWSSVASAGQVFTVFNDFKKAIYINGIIOYPGISYQTEGGTVTFSN |  |
|   | consensus/100% |        |        | NSAPVKLMRNVNNSNDSDWVTLFDSKTTVWSSIASAGQVFTVFNDFKKAIYINGIIOYPGISYQTEGGTVTFSN |  |

|   |                |        |        |                                                                                  |  |
|---|----------------|--------|--------|----------------------------------------------------------------------------------|--|
|   |                | cov    | pid    | 161                                                                              |  |
| 1 | YP_009153198.1 | 100.0% | 100.0% | SLQAGDNVYIVVGEDSDNTTNTQYISTALDNQTTIILPYEKNSNYLFTNGVLOYPNSFTIVNNTITNSSMQQDDNIFVL  |  |
| 2 | YP_007007683.1 | 87.2%  | 48.1%  | YLQSGDNVYIVVGEDSDNTTNTQYISTALTEQNTIILPYSRSSNYVYINGIIOYPSFTTISNDIITNSSMQEEDNIFVL  |  |
|   | consensus/100% |        |        | .LQAGDNVYIVVGEcDSDNTTNTQYISTAhspostIhLPYp+sSNYlaInGIIOYpsFTTIsNshITNSSMQpSDNIFVL |  |



L

|                |                | cov    | pid    |     |                                                                                      |
|----------------|----------------|--------|--------|-----|--------------------------------------------------------------------------------------|
| 1              | YP_009153201.1 | 100.0% | 100.0% | 1   | [ . . . . . : . . . ]                                                                |
| 2              | YP_007007686.1 | 75.6%  | 29.3%  |     | -----MRFNMSLNLSATNISGALIDAGDFVINKRLVSNQILYYTDPVTSIKTGYVWKGTLP HITSTNNPNTDGGISDTAWVPV |
| consensus/100% |                |        |        |     | .....                                                                                |
|                |                |        |        |     |                                                                                      |
| 1              | YP_009153201.1 | 100.0% | 100.0% | 81  | . . . . . 1 . . . . . :                                                              |
| 2              | YP_007007686.1 | 75.6%  | 29.3%  |     | -----METEGLTLDWNAHLPTVEVAYGLTKNSLKWKSGTTATSDDYWLYTDGTVWNVGVVGLGNNPETSTCFEKITP        |
| consensus/100% |                |        |        |     | .....METEGLTLDWNAHLPTVEVAYGLTKNSLKWKSGTTATSDDYWLYTDGTVWNVGVVGLGSSPETSTCFEKITP        |
|                |                |        |        |     |                                                                                      |
| 1              | YP_009153201.1 | 100.0% | 100.0% | 161 | . . . . . 2 . . . . . :                                                              |
| 2              | YP_007007686.1 | 75.6%  | 29.3%  |     | NFNASIKTYSASATDGQTDENIPFTFSTITVFVNGSIQLPGLNYTVSGSTLFTTTELEAGDLLYVFIGNENI STNDK NR    |
| consensus/100% |                |        |        |     | NFNASIKTYSASATDGQTDENIPFTFSTITVFVNGSIQLPGLNYTVSGSTLFTTTELEAGDLLYVFIGNENI STNDK NR    |
|                |                |        |        |     |                                                                                      |
| 1              | YP_009153201.1 | 100.0% | 100.0% | 241 | . . . . . 3 . . . . . :                                                              |
| 2              | YP_007007686.1 | 75.6%  | 29.3%  |     | IYTANAMQGOTTIQVPYDFSTAIIVYNGV LQNPITAYSIGADRITFSEELYQDDEIIIMLGDIIIQSDEYVVKQELLDV     |
| consensus/100% |                |        |        |     | IYTANAMQGOTTIQVPYDFSTAIIVYNGV LQNPITAYSIGADRITFSEELYQDDEIIIMLGDVVVQSDEYVVKNDLLSP     |
|                |                |        |        |     |                                                                                      |
| 1              | YP_009153201.1 | 100.0% | 100.0% | 321 | . . . . . 4                                                                          |
| 2              | YP_007007686.1 | 75.6%  | 29.3%  |     | NASSYINTKSGNSIQEEFDILYNSNSISKI IYSDIKNINWDEINEIFVCGKITNTTEGAGYFYDNDNITITVEDGGICFV    |
| consensus/100% |                |        |        |     | DASDNINTNDGTSVQONIDNFSNENNLFSN-DNGLSNINYSK--SIFSN-----NYKSTLYDLYQN-----              |
|                |                |        |        |     |                                                                                      |
| consensus/100% |                |        |        |     | sAsS..INTpsGsSlQpphd.h.N.Nsl.p...sslPNINacp..plfss.....shcushY.hYpN.....             |

M

|   |                | cov    | pid    |     |                                                                                    |
|---|----------------|--------|--------|-----|------------------------------------------------------------------------------------|
|   |                |        |        | 1   | [                                                                                  |
| 1 | YP_009153202.1 | 100.0% | 100.0% |     | MSLSNLSSSSNSNGAFLDYGEFRSGVYIQTSNQILYFTDENGNKVG YQWKGLLPHTTTTNDPSTDGGISDTAWCSIVGSGF |
| 2 | YP_007007687.1 | 69.5%  | 31.4%  |     | MSLSNLSSSSNSNGAFLDYGEFRSGVYIQTSNQILYFTDENGNKVG YQWKGLLPHTTTTNDPSTDGGISDTAWCSIVGSGF |
|   | consensus/100% |        |        |     | MSLSNLSSSSNSNGAFLDYGEFRSGVYIQTSNQILYFTDENGNKVG YQWKGLLPHTTTTNDPSTDGGISDTAWCSIVGSGF |
|   |                |        |        | 81  |                                                                                    |
|   |                |        |        |     | 1                                                                                  |
| 1 | YP_009153202.1 | 100.0% | 100.0% |     | IEKLSKEGIDLSWKAHLPTVEVSYNLPKSLKWEEGTINSTDNDYWL YPGDGTVWNGIGVLCIPDAPFKQIVEQNNVIE    |
| 2 | YP_007007687.1 | 69.5%  | 31.4%  |     | IEKLSKEGIDLSWKAHLPTVEVSYNLPKSLKWEEGTINSTDNDYWL YPGDGTVWNGIGVLCIPDAPFKQIVEQNNVIE    |
|   | consensus/100% |        |        |     | IEKLSKEGIDLSWKAHLPTVEVSYNLPKSLKWEEGTINSTDNDYWL YPGDGTVWNGIGVLCIPDAPFKQIVEQNNVIE    |
|   |                |        |        | 161 |                                                                                    |
|   |                |        |        |     | 2                                                                                  |
| 1 | YP_009153202.1 | 100.0% | 100.0% |     | WSAIAATEGQNQFTVPYEFTNISVFINGLLQNKSTGGYVWNGSTV TINGSLKAGDDLHVVISNIPKNNYITDVE-----   |
| 2 | YP_007007687.1 | 69.5%  | 31.4%  |     | WSTIAATEGQNQFTVPYEFTNISVFINGLLQNKSTGGYVWNGSTV TINGSLKAGDVLHVVISNVHTTNLIYALQSDLNNYY |
|   | consensus/100% |        |        |     | WSsIAATEGQNQFTVPYEFTNISVFINGLLQNKSTGGYVWNGSTV TINGSLKAGDsLHVVISNl.hpNI.Yhhps-..... |
|   |                |        |        | 241 |                                                                                    |
|   |                |        |        |     | 3                                                                                  |
| 1 | YP_009153202.1 | 100.0% | 100.0% |     | ----LSQPDAAQKIGLLHGGNIQNLFNLSFDNFNIDKTI GST--DVTSQINNIFSLANQINIPIKQHDGTYLVS GSTIFT |
| 2 | YP_007007687.1 | 69.5%  | 31.4%  |     | TKTNNLSTSGSSYIGLTQGGTLDEAITTYITPQMVNDTPYQTFGTAL TSACNKA--MANGIG-EVRIPAGRYILDKTVDIS |
|   | consensus/100% |        |        |     | ....LspssuuphIGLhpGGslpph.salo.pMhN.s.htoh..slTsthNph..hNtIs..l+.sGpyllstos.ho     |

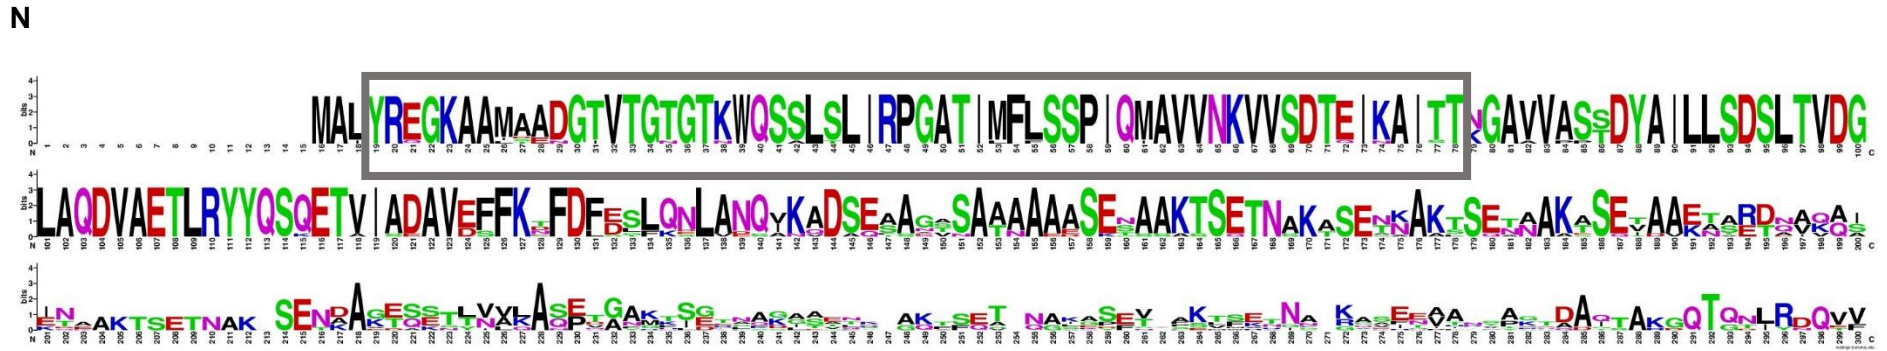

**Figure S1.** Conserved sequences at the N-terminus of the *Klebsiella* RBPs per family using a WebLogo when multiple RBP sequences are available, or a pairwise alignment when only two RBP sequences are available. (A) N-terminal anchor of the first RBP of KP32viruses; (B) conserved peptide of the second RBP of KP32viruses; (C) N-terminal anchor of the first RBP of KP34viruses; (D) conserved peptide of the second RBP of KP34viruses; (E) N-terminal anchor of the first RBP of viruses belonging to the Menlow group; (F) conserved peptide of the second RBP of viruses belonging to the Menlow group; (G) conserved peptide of the third RBP of viruses belonging to the Menlow group; (H) conserved peptide of the fourth RBP of viruses belonging to the Menlow group; (I) conserved peptide of the second RBP of viruses belonging to the  $\Phi$ K64-1; (J) conserved peptide of the fourth RBP of viruses belonging to the  $\Phi$ K64-1 group; (K) anchor of the fifth RBP of viruses belonging to the  $\Phi$ K64-1 group; (L) conserved peptide of the eighth RBP of viruses belonging to the  $\Phi$ K64-1 group; (M) conserved peptide of the ninth RBP of viruses belonging to the  $\Phi$ K64-1 group; (N) N-terminal anchor of the first RBP of KP36viruses. The red frames indicate the region of RBPs detected to be homologous to T4gp10. In the case of KP36viruses, the region homologous to the T5 distal tail protein domain B was indicated with grey frame.
