# Supplementary material for: Modeling the Architecture of Depolymerase-Containing Receptor Binding Proteins in Klebsiella Phages
Source: Front Microbiol. 2019 Nov 15;10:2649. doi: 10.3389/fmicb.2019.02649 (PMC6872550; doi:10.3389/fmicb.2019.02649)
Supplement: Supplementary file 3 [file Table_2.xlsx]

## Sheet: Table S2
	Table S2. Enzymatic activity prediction of receptor binding proteins (RBPs).
	Notes to the table
	*	Criteria used to predict the probability of presence of enzymatic activity in the RBP sequence (YES, LIKELY, NO)
		YES
		All criteria below (1-5) must be fulfilled. These RBP depolymerases are indicated without additional labelling in the tables in the manuscript.
		1) the protein must be longer than 200 residues;
		2) the protein must be annotated as tail fiber/tail spike in the NCBI database or randomly annotated as hypothetical protein, gene product number, but not by other specific annotations;
		3) the protein must show homology to domains annotated as lyase (hyaluronate lyases (hyaluronidases), pectin/pectate lyases, alginate lyases, K5 lyases), as hydrolase (sialidases, rhamnosidases, levanases, dextranases and xylanases) or as lipase with a confidence of at least 40% in PHYRE2, or the enzymatic domain should also be recognized by at least SWISS-MODEL, HMMER or BLASTP;
		4) the length of homology with one of these enzymatic domains should span at least 100 residues;
		5) a typical β-helical structure should be predicted by PHYRE2.
		6) if the enzymatic activity was experimentaly confirmed then YES
		LIKELY
		When the RBP only partially fulfils the criteria set above, the RBP is indicated with label (b) in the tables in the manuscript.
		If only minimal 4 out of 1-5 criteria are fulfilled, with the third criterium as mandatory.
		NO
		In all other cases.
	**	Presented parameters for different webtools. When the confidence of the prediction by Phyre2 was below 0.4, other webtools were used as well.
		PHYRE2: Template name (confidence of the predicted structural model on a scale between 0 and 1|the percentage identity between the RBP amino acid sequence and the template|alignment starting position in the amino acid sequence of the RBP|alignment end position in the amino acid sequence of the RBP)
		SWISS-MODEL: Description (Seq Identity|Seq similarity|Range|Coverage)
		HMMER: Description (Coordinates of the alignment);
		BLASTP: Name, Accession, Description (Interval|E-value)
	***	Proteins possessing experimentally confirmed depolymerising activity were marked in the tables of the manuscript with (a) and in red in this supplementary table.
		NF = not found
		Phage	Accesion number	Number of aa	NCBI annotation	PHYRE2 (confidence|identity|alignment start|alignment end)**	Presence of β-helix	Other webtool if necessary**	Presence of chaperone	Presence of enzymatic activity*	Accesion number	Number of aa	NCBI annotation	PHYRE2 (confidence|identity|alignment start|alignment end)	Presence of β-helix	Other webtool if necessary**	Presence of the chaperone	Presence of enzymatic activity*
		KP32viruses group A									KP32viruses group A
		First RBP									Second RBP
		KP32	YP_003347555.1	869aa	tail fiber protein	endo-n-acetylneuraminidase intramolecular chaperone (1|27|676|864), glucan 1,3-beta-glucosidase (0.988|21|298|543)	YES		PHYRE2: chaperone of endo-n-acetylneuraminidase (1|27|676|864);SWISS-MODEL: endo-N-acetylneuraminidase (30.77%|0.35|736 - 865|0.15) HMMER: chaperone of endosialidase (770 - 825); BLASTP: peptidase_S74,pfam13884,chaperone of endosialidase (770-823|1.41e-11)	YES	YP_003347556.1	576aa	hypothetical protein	polygalacturonase (0.972|12|36|305), pectate lyase (0.877|17|41|239)	YES		NF	YES
		K11	YP_002003830.1	875aa	gp17	exopolygalacturonase (0.977|17|325|628), rhamnogalacturonase (0.977|13|359|628)	YES		NF	YES	YP_002003831.1	596aa	unknown product	polygalacturonase (0.976|17|35|310), beta-1,3-glucanase (0.962|18|31|248)	YES		NF	YES
		KP32 isolate 194	AWN07125.1	777aa	tail fiber protein	beta-1,3-glucanase (0.978|21|296|631), rhamnogalacturonase (0.978|14|275|623)	YES		NF	YES	AWN07126.1	555aa	tail fiber family protein	endo-1,4-beta-xylanase (0.977|18|408|552), cellulose 1,4-beta-cellobiosidase (0.965|17|390|550)	YES		NF	YES
		KpV763	AOT28172.1	777aa	putative tail fiber (tailspike) protein	glucan 1,3-beta-glucosidase (0.981|17|296|632), rhamnogalacturonase (0.978|14|275|623)	YES		NF	YES	AOT28173.1	524aa	putative tail fiber family protein	endo-1,4-beta-xylanase (0.976|18|377|521), arabinogalactan endo-1,4-beta-galactosidase (0.94|20|371|519), hyaluronate lyase (0.875|17|373|519)	YES		NF	YES
		KP32 isolate 192	AWN07083.1	777aa	tail fiber protein	glucan 1,3-beta-glucosidase (0.981|17|296|632), rhamnogalacturonase (0.978|14|275|623)	YES		NF	YES	AWN07084.1	555aa	tail fiber family protein	endo-1,4-beta-xylanase (0.975|18|408|552), hyaluronate lyase (0.872|17|404|550)	YES		NF	YES
		K5-2	APZ82804.1	792aa	tail fiber protein	glucan 1,3-beta-glucosidase (0.999|24|292|719), rhamnogalacturonase (0.997|17|295|598)	YES		NF	YES	APZ82805.1	685aa	hypothetical protein	rhamnogalacturonase (0.958|27|37|98), pectate lyase (0.946|16|37|85) glucan 1,3-beta-glucosidase (0.947|18|37|313)	YES		NF	YES
		KP32 isolate 196	AWN07213.1	903aa	tail fiber protein	rhamnogalacturonase (0.929|17|275|452), exopolygalacturonase (0.791|16|268|511)	YES		NF	YES	AWN07214.1	613aa	endo-N-neuraminidase	exo-poly-alpha-d-galacturonosidase (0.901|15|46|275), polygalacturonase (0.877|13|46|372)	YES		NF	YES
		KpV766	AOZ65569.1	903aa	putative tail fiber protein	rhamnogalacturonase (0.911|18|275|452)	YES		NF	YES	AOZ65570.1	511aa	putative tail fiber protein	gdsl-like lipase/acylhydrolase family protein (0.981|20|118|326), putative lipase (0.976|18|68|310)	NO	SWISS-MODEL: rhamnogalacturonan acetylesterase (19.55%|0.29|73 - 314|0.35) Putative lipase from the G-D-S-L family (21.08%|0.30|70 - 310|0.36); HMMER: GDSL-like Lipase/Acylhydrolase family (112-309); BLASTP: Lipase_GDSL, pfam00657, GDSL-like Lipase/Acylhydrolase (110-310|6.83e-06), SGNH_hydrolase, cd00229 (74-223|1.15e-06)	NF	LIKELY (lack of β-helix)
		KpV289	YP_009215498.1	903aa	putative tailspike protein	rhamnogalacturonase (0.914|18|275|452)	YES		NF	YES	YP_009215499.1	511aa	phage tail fibers	gdsl-like lipase/acylhydrolase family protein (0.981|20|118|326), putative lipase (0.976|18|68|310)	NO	SWISS-MODEL: acetyl xylan esterase (20%, 0.30|68 - 319|0.39), putative lipase from the G-D-S-L family (21.08%|0.30|68 - 310|0.36), rhamnogalacturonan acetylesterase (19.55%0.29|73 - 314|0.35); HMMER: GDSL-like Lipase/Acylhydrolase family (112-309); BLASTP: GNH_hydrolase, cd00229 (74-223, 1.15e-06), lipase_GDSL, pfam00657, GDSL-like Lipase/Acylhydrolase (110-310, 6.83e-06)	NF	LIKELY (lack of β-helix)
		IME 205	ALT58497.1	793aa	tail fibers protein	exo-poly-alpha-d-galacturonosidase (0.999|18|283|687), pectate lyase (0.999|14|295|675)	YES		NF	YES	ALT58498.1	641aa	hypothetical protein	rhamnogalacturonase (0.969|11|44|396), pectin lyase (0.364|13|313|451)	YES		NF	YES
		K5	YP_009198668.1	817aa	tail spike protein	rhamnogalacturonase (0.993|20|296|708), endopolygalacturonase (0.989|23|310|627)	YES		NF	YES	YP_009198669.1	575aa	tail spike protein	endopolygalacturonase (0.966|11|35|326), rhamnogalacturonase (0.95|15|22|238)	YES		NF	YES
		K5-4	APZ82847.1	744aa	putative tail fiber protein	exopolygalacturonase (0.961|15|301|574)	YES		NF	YES	APZ82848.1	684aa	hypothetical protein	beta-1,3-glucanase (0.961|34|41|84), glucan 1,3-beta-glucosidase (0.948|18|36|312)	YES		NF	YES
		KP32viruses group B
		KP32 isolate 195	AWN07172.1	1017aa	tail fiber protein	exopolygalacturonase (0.989|14|272|775), pectate lyase (0.977|14|272|749)	YES		NF	YES
		SH-Kp 152410	AUV61507.1	1017aa	hypothetical protein	rhamnogalacturonase (0.986|16|278|694), pectate lyase (0.976|15|272|749)	YES		NF	YES
		IL33	ARB12452.1	1242aa	tail fibers protein	exo-poly-alpha-d-galacturonosidase (0.265|14|330|539)	YES	SWISS-MODEL:endo-N-acetylneuraminidase (27.33%|0.33|1090 - 1240|0.12)	PHYRE2: chaperone: endo-n-acetylneuraminidase (1|26|1065|1239); SWISS-MODEL Endo-N-acetylneuraminidase (27.33%|0.33|1090 - 1240|0.12); BLASTP: peptidase_S74, pfam13884, chaperone of endosialidase (1127-1183|1.60e-07)	LIKELY (confidence of model lower than 40% but presence of chaperone)
		PRA33	ARB12406.1	1242aa	tail fibers protein	hydrolase: endo-alpha-sialidase (0.428|20|1086|1126)	NO	SWISS-MODEL: endo-N-acetylneuraminidase (26.87%|0.33|1037 - 1240|0.16)	PHYRE2: chaperone of endo-n-acetylneuraminidase (1|27|1064|1239); SWISS-MODEL: endo-N-acetylneuraminidase (26.87%|0.33|1037 - 1240|0.16); HMMER: chaperone of endosialidase (1127 - 1183); BLASTP: peptidase_S74, pfam13884, chaperone of endosialidase (1127-1183|1.50e-07)	LIKELY (too short length of model and lack of β-helix but presence of chaperone)
		BIS33	ARB12500.1	1242aa	tail fibers protein	lyase: k5 lyase (0.56|22|1039|1126)	NO	SWISS-MODEL: Endo-N-acetylneuraminidase (26.77%|0.33|1037 - 1240|0.16)	PHYRE2: chaperone: endo-n-acetylneuraminidase (1|24|1047|1239); SWISS-MODEL: Endo-N-acetylneuraminidase (26.77%|0.33|1037 - 1240|0.16); HMMER: chaperone of endosialidase (1127 - 1183); BLASTP: peptidase_S74, pfam13884, chaperone of endosialidase (1127-1183|1.50e-07)	LIKELY (too short length of model and lack of β-helix but presence of chaperone)
		IME321	AXE28435.1	820aa	tail fibers protein	NF	NO	NF	NF	NO
		Kp1	YP_009190948.1	1017aa	tail fibers protein (N-terminal part not annotated)	exopolygalacturonase (0.989|14|272|775), pectate lyase (0.977|14|272|749)	YES		NF	YES
		KP32viruses group C									KP32viruses group C
		First RBP									Second RBP
		KpV767	AOZ65519.1	843aa	putative tail fiber protein	exopolygalacturonase (1|16|303|655), pectate lyase (0.999|14|303|655)	YES		NF	YES	AOZ65520.1	69aa	hypothetical protein	NF	NO	NF	NF	NO
		KP32viruses group D									KP32viruses group D
		First RBP									Second RBP
		2044-307w	ASZ78307.1	347aa	tail fiber protein	hydrolase (64.4|24|238|347), alpha-galactosidase (22.2|15|17|72)	NO	NF	NF	NO (lack of β-helix, enzymatic activity not confirmed by any other online tool, presence of chaperone not detected)	ASZ78308.1	556aa	hypothetical protein	gdsl-like lipase/acylhydrolase family protein (0.993|15|74|250), rhamnogalacturonan acetylesterase (0.992|30|50|250)	NO	Putative lipase from the G-D-S-L family (17.34%|0.29|45 - 248|0.31) acetyl xylan esterase (16.48%|0.29|48 - 253|0.32); BLASTP: SGNH_hydrolase, cd00229 (84-249,1.69e-10), Lipase_GDSL, pfam00657, GDSL-like Lipase/Acylhydrolase (139-246,7.83e-03); HMMER: GDSL-like Lipase/Acylhydrolase family (110-240)	NF	LIKELY (lack of β-helix)
		KP34viruses group A									KP34viruses group A
		First RBP									Second RBP
		KP34	YP_003347643.1	307aa	putative tail fiber protein	hydrolase, alpha-galactosidase (0.467|18|5|64)	NO	NF	NF	NO (too short length of prediction, lack of β-helix, no confirmation in other online tool)	YP_003347651.1	630aa	hypothetical protein	isopullulanase (0.951|14|206|434), rhamnogalacturonase (0.687|18|32|371)	YES		NF	YES
		SU503	YP_009199929.1	307aa	putative tail fiber protein	hydrolase, alpha-galactosidase (0.457|17|5|64)	NO	SWISS-MODEL: hyaluronidase-phage associated (42.31%|0.36|124 - 149|0.08)	NF	NO (too short length of prediction, lack of β-helix)	YP_009199937.1	500aa	hypothetical protein	pectate lyase (0.905|17|7|352), endo-xylogalacturonan hydrolase (0.471|14|47|234)	YES		NF	YES
		F19	YP_009006065.2	307aa	putative tail fiber protein	lyase (0.359|14|224|302)	NO	NF	NF	NO (too short prediction, too low confidence of prediction, no β-helix)	YP_009006074.1	577aa	tail fiber family protein	endo-1,4-beta-xylanase (0.737|22|430|566), isopullulanase (0.321|16|252|319)	YES		NF	YES
		B_KpnP_KpV475	YP_009280712.1	318aa	putative tail fiber protein	hydrolase, alpha-glucosidase (0.47|12|5|73)	NO	SWISS-MODEL: hyaluronidase-phage associated (43.33%|0.37|123 - 152|0.09)	NF	NO (too short length of prediction, lack of β-helix)	YP_009280720.1	651aa	hypothetical protein	glucanase (0.198|24|414|466), viral protein, preneck appendage protein (22.6|17|254|406)	YES	BLASTP: beta_helix, pfam13229 (288-450, 8.69e-03)	NF	LIKELY (confidence too low, length of prediction too short, but presence of β-helix confirmed by other tool)
		KpV71	YP_009302749.1	318aa	putative tail fiber protein	hydrolase, alpha-galactosidase (0.436|17|11|64)	NO	SWISS-MODEL: hyaluronidase-phage associated (43.33%|0.36|124 - 153|0.09)	NF	NO (too short length of prediction, lack of β-helix)	YP_009302756.1	651aa	hypothetical protein	exopolygalacturonase (0.209|14|285|471)	YES	NF	NF	YES (confidence of model below 40%, but confirmed experimentally)
		NTUH-K2044-K1-1	YP_009098379.1	318aa	putative tail fiber protein	hydrolase, alpha-galactosidase (0.427|17|11|64)	NO	SWISS-MODEL: hyaluronidase-phage associated (43.33%|0.36|124 - 153|0.09)	NF	NO (too short length of prediction, lack of β-helix)	YP_009098385.1	651aa	hypothetical protein	endopolygalacturonase (0.4|16|263|476), exopolygalacturonase (0.379|14|285|471)	YES		NF	YES
		KPV811	APD20665.1	318aa	tail fibers protein	hydrolase, alpha-galactosidase (0.645|18|5|64)	NO	SWISS-MODEL: hyaluronidase-phage associated (43.33%|0.36|123 - 151|0.09)	NF	NO (too short length of prediction, lack of β-helix)	APD20657.1	563aa	tail fibers protein	rhamnogalacturonase (1|16|17|399), pectate lyase (1|16|12|404)	YES		NF	YES
		KpV48	AOZ65257.1	318aa	putative tail fiber protein	hydrolase, alpha-galactosidase (0.547|17|5|64)	NO	SWISS-MODEL: hyaluronidase-phage associated (48%|0.41|123 - 147|0.08)	NF	NO (too short length of prediction, lack of β-helix)	AOZ65265.1	669aa	hypothetical protein	glucan 1,3-beta-glucosidase (0.41|16|134|340), endo-xylogalacturonan hydrolase (0.29|13|102|340), beta-galactosidase (0.217|20|380|434)	YES		NF	YES
		phiBO1E	AIT13620.1	318aa	tail fibers protein	hydrolase, alpha-galactosidase (0.56|17|5|64)	NO	SWISS-MODEL: hyaluronidase-phage associated (43.33%|0.38|123 - 151|0.09)	NF	NO (too short length of prediction, lack of β-helix)	AIT13628.1	494aa	hypothetical protein	glucan 1,3-beta-glucosidase (0.996|25|13|224)	YES		NF	YES
		AltoGao	ASV44938.1	307aa	tail fiber protein	hydrolase, alpha-galactosidase (0.57|17|5|64)	NO	SWISS-MODEL: hyaluronidase-phage associated (44%|0.38|123 - 147|0.08)	NF	NO (too short length of prediction, lack of β-helix)	ASV44946.1	563aa	hypothetical protein	hydrolase (0.989|23|16|352)	YES		NF	YES
		myPSH1235	30838-31279	314aa	not annotated	hydrolase, alpha-galactosidase (0.651|18|5|64)	NO	SWISS-MODEL: hyaluronidase(46.67%|0.37|120 - 149|0.10), hyaluronidase phage associated (39.29%|0.35|120 - 145|0.09)	NF	NO (too short length of prediction, lack of β-helix)	35768-37564	598aa	not annotated	hyaluronate lyase (0.906|11|467|578)	YES	SWISS-MODEL: hyaluronate lyase (15.28%|0.28|505 - 578|0.12)	NF	YES
		KP34viruses group B									KP34viruses group B
		First RBP									Second RBP
		vB_Kp2	YP_009188359.1	530aa	tail fibers protein	hydrolase, alpha-galactosidase (0.838|17|5|64), hydrolase, alpha-glucosidase (0.768|10|5|73)	NO	SWISS-MODEL: hyaluronidase-phage associated (36%|0.33|123 - 147|0.05), hyaluronidase-phage associated(44%|0.38|123 - 147|0.05)	NF	NO (too short length of prediction, lack of β-helix)	YP_009188367.1	660aa	hypothetical protein	rhamnogalacturonase (0.968|17|82|402), exo-poly-alpha-d-galacturonosidase (0.96|15|96|296)	YES		NF	YES
		SU552A	YP_009204835.1	793aa	putative tail fiber protein	lyase (0.995|7|284|366), hydrolase, glucan 1,3-beta-glucosidase (0.647|25|328|605)	YES		NF	YES	YP_009204843.1	548aa	putative tail fiber protein	rhamnogalacturonase (0.992|17|36|414), pectate lyase (0.991|17|36|428)	YES		NF	YES
		KpV41	YP_009188788.1	858aa	putative tail fiber protein	hydrolase (0.995|32|267|388), hydrolase (0.964|23|272|448)	NO	SWISS-MODEL: glucan 1,3-beta-glucosidase (32.56%|0.38|358 - 402|0.05)	NF	LIKELY (lack of β-helix)	YP_009188797.1	651aa	hypothetical protein	exopolygalacturonase (0.324|14|285|471), glucanase (0.276|24|413|466)	YES	NF	NF	LIKELY (confidence of model below 40% but presence of β-helix)
		phiKpS2	AWK24039.1	946aa	putative tail fiber protein	endo-xylogalacturonan hydrolase (0.998|17|353|690), galacturonase ( 0.998|20|349|685)	YES		NF	YES	AWK24047.1	581aa	tail fiber family	endo-1,4-beta-xylanase (0.889|17|431|570), pectate lyase (0.689|15|218|342)	YES		NF	YES
		KpV74	APZ82760.1	602aa	putative tail fiber protein	NF	NO	NF	NF	NO	APZ82768.1	577aa	putative tail fiber protein	endo-1,4-beta-xylanase (0.913|17|427|566), glucan 1,3-beta-glucosidase (0.878|21|90|319)	YES		NF	YES
		KP34viruses group C									KP34viruses group C
		First RBP									Second RBP
		KP-Rio/2015	36399-38783	794aa	not annotated	hydrolase (0.885|16|306|541), pectin lyase-like galacturonase (0.872|14|321|571)	YES		NF	YES	42918-43105	61aa	not annotated	NF	NO	NF	NF	NO
		KP36viruses group A
		KP36	YP_009226011.1	883aa	putative tail fiber protein	exo-poly-alpha-d-galacturonosidase (0.977|13|256|660), endo-xylogalacturonan hydrolase (0.976|16|265|646)	YES		NF	YES
		KLPN1	YP_009195383.1	756aa	hypothetical protein	endo-1,4-beta-xylanase (0.979|20|606|753), rhamnogalacturonase (0.972|14|269|464)	YES		NF	YES
		KOX1	ARM70347.1	765 aa	hypothetical protein	glucan 1,3-beta-glucosidase (0.983|23|211|373), pectate lyase (0.982|18|206|416)	YES		NF	YES
		JY917	AVI03134.1	812aa	tail fiber protein	hydrolase, isoamylase (0.455|36|536|597), beta-glucuronidase (0.202|21|537|612)	NO	NF	NF	NO (too low confidence of model and too short length of prediction, no domain detected by other online tool)
		Sushi	YP_009196676.1	832aa	tail fiber	K5 lyase (0.338|23|501|658)	YES		PHYRE2: chaperone of endo-n-acetylneuraminidase (0.966|24|723|831); SWISS-MODEL: endo-N-acetylneuraminidase (16.52%|0.30|711 - 832|0.14); HMMER: chaperone of endosialidase (723-773); BLASTP: peptidase_S74, pfam13884 (723-773, 1.70e-08)	LIKELY (confidence of model below 40% but presence of chaperone)
		MezzoGao	ASV44964.1	973aa	hypothetical protein	lyase, sialidase (0.459|17|729|820)	NO	NF	PHYRE2: chaperone of endo-n-acetylneuraminidase (1|22|732|971); HMMER: Endo-N-acetylneuraminidase (26.20%|0.33|780 - 969|0.19); BLASTP: Peptidase_S74, pfam13884, chaperone of endosialidase (841-897, 1.68e-05)	LIKELY (length of prediction only slightly below 100 aa and no typical β-helix, but the presence of chaperone detected)
		NJS1	AXF39389.1	992aa	putative tail fiber protein	alginate lyase (0.535|29|928|969)	NO	SWISS-MODEL: endo-N-acetylneuraminidase (25.41%|0.33|805 - 988|0.18)	PHYRE2: chaperone of endo-n-acetylneuraminidase (1|22|773|990); SWISS-MODEL: endo-N-acetylneuraminidase (25.41%|0.33|805 - 988|0.18); BLASTP: peptidase_S74, pfam13884, chaperone of endosialidase (860-916,7.72e-07)	LIKELY (lack of β-helix but presence of chaperone)
		GML-KpCol1	AUE22051.1	972aa	tail fiber protein	hydrolase, alpha-glucosidase (0.764|19|853|918), alginate lyase (72.9|30|901|949)	NO	SWISS-MODEL: endo-N-acetylneuraminidase (27.88%|0.34|803 - 968|0.17)	PHYRE2: chaperone of endo-n-acetylneuraminidase (1|25|731|970); SWISS-MODEL: endo-N-acetylneuraminidase (27.88%|0.34|803 - 968|0.17); BLASTP: peptidase_S74, pfam13884, chaperone of endosialidase (840-896|1.68e-05)	LIKELY (too short length of the prediction and lack of β-helix but presence of chaperone)
		KpV522	AOZ65310.1	1141aa	putative tail fiber protein	hydrolase, gdsl-like lipase (1|20|780|1139), hydrolase, endoglucanase (0.991|18|855|1139), xylan esterase (0.99|17|880|1139)	NO	SWISS-MODEL: lipolytic protein G-D-S-L family (24.83%|0.33|979 - 1139|0.13), acetyl xylan esterase (23.33%|0.31|978 - 1139|0.13); HMMER: GDSL-like Lipase/Acylhydrolase family (976-1121)	NF	LIKELY (lack of β-helix but strong prediction of endoglucanase activity)
		KPN N141	ASW27458.1	879aa	tail fiber protein	hydrolase, alpha-fucosidase (0.53|22|505|616)	NO	SWISS-MODEL: endo-N-acetylneuraminidase (16.49%|0.33|688 - 875|0.21)	PHYRE2: chaperone of endo-n-acetylneuraminidase (1|22|638|877); SWISS-MODEL: endo-N-acetylneuraminidase (16.49%|0.33|688 - 875|0.21); BLASTP: peptidase_S74, pfam13884, chaperone of endosialidase (747-803|1.13e-05)	LIKELY (no β-helix, but presence of chaperone)
		KP36viruses group B
		PKP126	YP_009284923.1	833aa	hypothetical protein	hydrolase, gdsl-esterase (0.992|15|445|656), hydrolase, endoglucanase (0.989|17|417|653), hydrolase, rhamnogalacturonan acetylesterase (0.989|27|447|655)	NO	SWISS-MODEL: rhamnogalacturonan acetylesterase (22.67|0.30|447 - 655|0.21), putative lipase from the G-D-S-L family (15.82%|0.29|443 - 654|0.21), acetyl xylan esterase (14.75%|0.28|445 - 655|0.22); BLASTP: SGNH_hydrolase, cd00229, SGNH_hydrolase, or GDSL_hydrolase (490-650|2.23e-06), Lipase_GDSL, pfam00657, GDSL-like Lipase/Acylhydrolase (539-650|3.21e-03)	NF	LIKELY (no β-helix)
			YP_009284924	251aa	hypothetical protein	hydrolase, arabinanase (0.971|14|31|238), lyase, sialidase (0.969|11|57|), hydrolase, neuraminidase (0.959|13|57|238)	YES		NF	YES
		KP36viruses group C
		1513	YP_009197878.1	659aa	hypothetical protein	ND (no domain detected)	NO	NF	NF	NO
			YP_009197879.1	541aa	hypothetical protein	lyase, pectate lyase (0.975|17|1|533), rhamnogalacturonan lyase (0.969|16|2|136)	YES		NF	YES
		JD001group									JD001group
		First RBP									Second RBP
		JD001	YP_007392884.1	285aa	putative tail-fiber protein	NF	NO	NF	NF	NO	YP_007392887.1	757aa	gluconolaconase	hydrolase, glucan 1,3-beta-glucosidase (0.993|20|201|504), hydrolase, exo-poly-alpha-d-galacturonosidase (0.992|17|201|569)	YES		NF	YES
		vB_KpnM_KpV52	AOZ65389.1	297aa	putative tail fiber protein	NF	NO	NF	NF	NO	AOZ65386.1	668aa	putative tail fiber family protein	hydrolase, endo-1,4-beta-xylanase (0.991|15|515|665), hydrolase, endoglucanase (0.99|17|513|665)	YES		NF	YES
		vB_KpnM_KpV79	ATI16499.1	199aa	putative tail fiber protein	lyase (0.208|17|15|68)	NO	NF	NF	NO (too low confidence, too short length of prediction, lack of β-helix)	ATI16495.1	721aa	tail fiber protein/pectate lyase superfamily protein	hydrolase, exo-poly-alpha-d-galacturonosidase (0.995|13|172|556), hydrolase, pectate lyase (0.994|15|172|516)	YES		NF	YES
		Menlow group
		First RBP
		Menlow	AUG87748.1	960aa	tail spike protein	hydrolase, rhamnogalacturonase (0.963|17|449|770)	YES		NF	YES
		KpS110	AUV59228.1	960aa	tailspike protein	hydrolase, tail fiber protein (0.93|32|351|485)	NO	NF	NF	NO (lack of β-helix, ND found by other tool)
		May	AUG87958.1	1180aa	tail spike protein	hydrolase, polygalacturonase (0.901|13|531|705)	YES		PHYRE2: chaperone of endo-n-acetylneuraminidase (0.999|22|974|1180); SWISS-MODEL: endo-N-acetylneuraminidase (23.67%|0.31|992 - 1180|0.14 )	YES
		0507-KN2-1	YP_008532046.1	1072aa	putative tailspike protein	hydrolase, exo-poly-alpha-d-galacturonosidase (0.496|22|424|514)	NO	NF	NF	NO (lack of β-helix, NF by other tool)
		Second RBP
		Menlow	AUG87749.1	768aa	tail spike protein	hydrolase, exopolygalacturonase (0.48|15|379|510)	YES		NF	YES
		KpS110	AUV59230.1	857aa	tail fiber protein	hydrolase, glucan 1,3-beta-glucosidase (0.964|12|289|567), endo-xylogalacturonan hydrolas (0.962|14|283|575)	YES		NF	YES
		May	AUG87959.1	1288aa	tail spike protein	hydrolase, endo-alpha-sialidase (0.744|26|1043|1118)	NO	SWISS-MODEL: endo-N-acetylneuraminidase (29.49%|0.35|1043 - 1285|0.17), K5 lyase (30.23%|0.34|1077 - 1118|0.03)	PHYRE2: chaperone of endo-n-acetylneuraminidase (1|28|1059|1284); BLASTP: peptidase_S74, pfam13884, chaperone of endosialidase (1119-1176|6.39e-03)	LIKELY (no β-helix but presence of chaperone)
		0507-KN2-1	YP_008532047.1	1245aa	putative tail fiber protein	k5 lyase (0.382|39|1025|1103), hydrolase, pectinesterase (0.309|24|394|511)	YES	SWISS-MODEL: K5 lyase (26.25%|0.33|1024 - 1104|0.06), endo-N-acetylneuraminidase (28.24%|0.32|1069 - 1244|0.14 )	PHYRE2: chaperone of endo-n-acetylneuraminidase (1|24|999|1245); BLASTP: peptidase_S74, pfam13884, chaperone of endosialidase (1105-1165|3.23e-04)	YES
		Third RBP
		Menlow	AUG87751.1	660aa	tail spike protein	hydrolase, exopolygalacturonase (0.328|21|360|513)	YES	SWISS-MODEL: poly(beta-D-mannuronate) C5 epimerase (2.86%|0.32|179 - 253|0.11)	NF	LIKELY (confidence lower than 40% but presence of β-helix)
		KpS110	AUV59232.1	674aa	tail fiber protein	hydrolase (1|29|100|670), hydrolase, rhamnogalacturonase (0.979|17|95|414)	YES		NF	YES
		May	AUG87960.1	660aa	tail spike protein	hydrolase, exopolygalacturonase (0.303|21|360|513)	YES	NF	NF	LIKELY (confidence of model below 40%, but presence of β-helix)
		0507-KN2-1	YP_008532048.1	657aa	tail spike protein head-binding protein	hydrolase, pectinesterase (0.309|24|394|511), particle-associated glycoside hydrolase (0.276|21|235|359)	YES	SWISS-MODEL: exopolygalacturonase (27.08%|0.32|179 - 232|0.07)	NF	LIKELY (confidence of model below 40%, but presence of β-helix and prediction by other tool)
		Fourth RBP
		Menlow	AUG87753.1	730aa	tail spike protein	hydrolase, dextranase (0.967|13|169|527)	YES		NF	YES
		KpS110	AUV59234.1	685aa	hypothetical_protein	hydrolase, pectate lyase (0.9|15|130|481)	YES		NF	YES
		May	AUG87962.1	692aa	tail_spike_protein	hydrolase, rhamnogalacturonase (0.888|20|128|291), hydrolase, exo-poly-alpha-d-galacturonosidase (0.35|17|128|313)	YES		NF	YES
		0507-KN2-1	YP_008532049.1	607aa	hypothetical protein RaK2 00526	hydrolase, putative sugar hydrolase (0.575|24|63|192)	NO	SWISS-MODEL: putative glycosyl hydrolase (24.07%|0.34|72 - 125|0.09), putative sugar hydrolase (22.45%|0.33|77 - 125|0.08)	NF	LIKELY (no β-helix but activity found by other tool)
		Fifth RBP
		Menlow	AUG87754.1	1612aa	hypothetical protein	hydrolase, endo-alpha-sialidase (0.941|21|1332|1601), hydrolase, alpha-1,3/4-fucosidase (0.369|11|1512|1611)	NO	NF	NF	LIKELY (no β-helix, no confirmation by other tool but long and high confidence of prediction)
		KpS110	AUV59236.1	1612aa	hypothetical protein	hydrolase, endo-alpha-sialidase (0.927|21|1227|1539), hydrolase, endo-alpha-sialidase (0.924|21|1332|1601)	NO	NF	NF	LIKELY (no β-helix, no confirmation by other tool but long and high confidence of prediction)
		May	AUG87963.1	1612aa	hypothetical protein	hydrolase, endo-alpha-sialidase (0.955|23|1227|1447), endosialidase (0.941|24|1227|1446), hydrolase/sugar binding protein, endoglucanase (0.452|11|1409|1544)	NO	NF	NF	LIKELY (no β-helix, no confirmation by other tool but long and high confidence of prediction)
		0507-KN2-1	YP_008532051.1	1616aa	vrlC_protein	endosialidase (0.958|28|1204|1450), hydrolase, endo-alpha-sialidase (0.934|21|1231|1543)	NO	NF	NF	LIKELY (no β-helix, no confirmation by other tool but long and high confidence of prediction)
		Additional RBP
		Menlow	no protein
		KpS110	AUV59229.1	554aa	hypothetical protein	rhamnogalacturonan lyase (0.98|15|2|222), hydrolase, xylosidase (0.974|12|3|333)	YES		NF	YES
		May	no protein
		0507-KN2-1	YP_008532050.1	542aa	hypothetical protein RaK2_00525	hydrolase, xylosidase (1|10|3|534), rhamnogalacturonan lyase (1|10|2|523), pectate lyase (1|17|1|542)	YES		NF	YES
		ΦK64-1-group
		First RBP
		ΦK64-1	YP_009153165.1	595aa	putative tail fiber protein	hydrolase, cellulose 1,4-beta-cellobiosidase (0.115|33|183|243)	YES	SWISS-MODEL: hyaluronidase, phage associated (30.19%|0.36|384 - 444|0.09)	NF	NO (confidence too low, length of prediction too short, β-helix very short and not connected with enzymatic activity)
		RaK2	YP_007007253	595aa	hypothetical protein	hydrolase, cellulose 1,4-beta-cellobiosidase (0.115|33|183|243)	YES	SWISS-MODEL: hyaluronidase, phage associated (30.19%|0.36|384 - 444|0.09)	NF	NO (confidence too low, length of prediction too short, β-helix very short and not connected with enzymatic activity)
		Second RBP
		ΦK64-1	YP_009153195.1	736aa	tail spike protein	hydrolase (0.817|41|16|61), hydrolase, beta-galactosidase (0.088|12|427|492)	NO	NF	NF	YES (length of prediction too short, no β-helix, not confirmed by other tool, but confirmed experimentally)
		RaK2	YP_007007681.1	580aa	hypothetical protein	hydrolase (0.899|47|16|58)	NO	NF	NF	NO (length of prediction too short, no β-helix, not confirmed by other tool)
		Third RBP
		ΦK64-1	YP_009153196.1	651aa	tailspike protein	hydrolase, rhamnogalacturonase (0.983|14|97|420), hydrolase, exopolygalacturonase (0.982|17|70|305)	YES		NF	YES
		RaK2	no protein
		Fourth RBP
		ΦK64-1	YP_009153197.1	702aa	putative tail fiber protein	hydrolase, glucan 1,3-beta-glucosidase (0.995|23|177|452), hydrolase, rhamnogalacturonase (0.994|15|175|452)	YES		NF	YES
		RaK2	YP_007007682.1	715aa	putative tail fiber protein	hydrolase, rhamnogalacturonase (0.992|15|168|450), endo-xylogalacturonan hydrolase (0.989|13|173|450)	YES		NF	YES
		Fifth RBP
		ΦK64-1	YP_009153198.1	1193aa	putative tail fiber protein	hydrolase, exopolygalacturonase (0.954|18|645|1092), hydrolase, rhamnogalacturonase (0.92|14|645|941)	YES		NF	YES
		RaK2	YP_007007683.1	1113aa	putative tail fiber protein	hydrolase, dextranase (0.364|19|756|882), hydrolase, exo-beta-d-glucosaminidase (0.358|21|507|549)	YES	SWISS-MODEL: xylan esterase (3.16%|0.26|200 - 241|0.03)	NF	YES (confidence lower than 40% but presence of β-helix and confirmation by other tool)
		Sixth RBP
		ΦK64-1	YP_009153199.1	584aa	putative tail fiber protein	hydrolase, exo-poly-alpha-d-galacturonosidase (0.962|13|129|439), glycosidase, polygalacturonase (0.858|15|129|439)	YES		NF	YES
		RaK2	YP_007007684.1	584aa	putative structural protein	hydrolase, exo-poly-alpha-d-galacturonosidase (0.962|13|129|439), glycosidase, polygalacturonase (0.858|15|129|439), pectate lyase (0.827|16|129|437)	YES		NF	YES
		Seventh RBP
		ΦK64-1	YP_009153200.1	779aa	putative structural protein	hydrolase, endo-alpha-sialidase (0.991|19|411|652)	YES		PHYRE2: chaperone of endo-n-acetylneuraminidase (1|31|558|777), HMMER: chaperone of endosialidase (653 - 710); BLASTP: Peptidase_S74, pfam13884, chaperone of endosialidase (653-711|9.00e-11)	YES
		RaK2	YP_007007685.1	779aa	putative structural protein	lyase (0.713|16|258|502), hydrolase, endo-alpha-sialidase (0.992|23|589|652)	YES		PHYRE2: chaperone of endo-n-acetylneuraminidase (1|30|558|777); HMMER: chaperone of endosialidase (653 - 709); BLASTP: peptidase_S74, pfam13884, chaperone of endosialidase (653-711|9.98e-10)	YES
		Eighth RBP
		ΦK64-1	YP_009153201.1	888aa	putative tail fiber protein	lyase (1|17|336|829), hydrolase, exopolygalacturonase (0.999|13|335|713), pectate lyase (0.998|17|335|695)	YES		NF	YES
		RaK2	YP_007007686.1	895aa	putative structural protein	hydrolase, glucan 1,3-beta-glucosidase (0.984|17|400|803), pectate lyase (0.983|13|400|780)	YES		NF	YES
		Ninth RBP
		ΦK64-1	YP_009153202.1	996aa	putative tail fiber protein	hydrolase, exopolygalacturonase (0.992|13|203|759), lyase (0.986|13|260|719)	YES		NF	YES
		RaK2	YP_007007687.1	806aa	putative structural protein	hydrolase, endopolygalacturonase (0.955|14|284|485), pectate lyase (0.938|15|285|485)	YES		NF	YES
		Tenth RBP
		ΦK64-1	YP_009153203.1	767aa	putative structural protein	hydrolase, glucan 1,3-beta-glucosidase (0.999|17|264|552), hydrolase, exopolygalacturonase (0.999|20|270|561)	YES		NF	YES
		RaK2	YP_007007688.1	767aa	putative structural protein	hydrolase, glucan 1,3-beta-glucosidase (1|15|252|755), hydrolase, exopolygalacturonase (0.999|19|269|561)	YES		NF	YES
		Eleventh RBP
		ΦK64-1	YP_009153204.1	719aa	putative structural protein	NF	NO	SWISS-MODEL: hyaluronoglucosaminidase (18.29%|0.30|589 - 688|0.11), glycosyl hydrolase (17.95%|0.30|592 - 685|0.11)	NF	NO (lack of model in PHYRE2, lack of β-helix)
		RaK2	YP_007007689.1	688aa	putative structural protein	NF	NO	NF	NF	NO (lack of model in PHYRE2, lack of β-helix)
